# Supplementary material for: High-Efficiency of Bi-Functional-Based Perovskite Nanocomposite for Oxygen Evolution and Oxygen Reduction Reaction: An Overview
Source: MDPI journal article supplement (doi:10.3390/ma14112976), 2021-05-31
Supplement: s1 [file s1]

**Table S1.** Summary of ORR and OER electrocatalytic activities of the reported various types of bifunctional based perovskite electrocatalysts.

| Methods                                   | Electrocatalysts                                                                            | Typical Morphology         | Onset Potential ORR (V) | Onset Potential OER (V) | Electrolytes (M) | Ref. |
|-------------------------------------------|---------------------------------------------------------------------------------------------|----------------------------|-------------------------|-------------------------|------------------|------|
| Oxalate precursor route                   | CaCu <sub>3</sub> Ti <sub>4</sub> O <sub>12</sub>                                           | Nanoparticles              | 0.83                    | 1.50                    | 0.1 KOH          | [1]  |
| Hot plate                                 | Fluorinated-copper manganese oxide (FCMO)                                                   | -                          | 0.94                    | 1.62                    | 0.1 KOH          | [2]  |
| Sol-gel                                   | La <sub>0.8</sub> Sr <sub>0.2</sub> Mn <sub>0.95</sub> Sc <sub>0.025</sub> O <sub>3-δ</sub> | Micro structured particles | 0.96                    | -                       | 0.1 KOH          | [3]  |
| Pyrolysis                                 | N-MWCNTs-Co                                                                                 | Foam like structure        | 0.334                   | 0.364                   | 0.1 KOH          | [4]  |
| Electro spinning                          | LaNi <sub>0.85</sub> Mg <sub>0.15</sub> O <sub>3</sub> (LNMO NFs)                           | Nanofiber                  | 0.45                    | -                       | 0.1 KOH          | [5]  |
| Polymer-assisted                          | LaCo <sub>1-x</sub> Ni <sub>x</sub> O <sub>3</sub>                                          | Nanoparticles              | -0.47                   | -                       | 0.1 KOH          | [6]  |
| Wet-chemical                              | Ni & Mn promoted Co <sub>3</sub> O <sub>4</sub>                                             | Mesoporous                 | 0.87                    | -                       | 0.1 KOH          | [7]  |
| Reverse hydrolysis                        | Nanostructured LaNiO <sub>3</sub> /Nitrogen doped carbon (NC)                               | Nanoparticles              | -                       | 0.4                     | 0.1 KOH          | [8]  |
| Sol-gel                                   | LaNi <sub>1-x</sub> Fe <sub>x</sub> O <sub>3</sub> (x= 0, 0.1, 0.2, 0.6)                    | Nanoparticles              | -                       | 0.64                    | 0.1 KOH          | [9]  |
| Polymer-assisted chemical solution (PACS) | La <sub>0.8</sub> Sr <sub>0.2</sub> MnO <sub>3</sub> (LSM)                                  | Nanoparticles              | -0.09                   | -                       | 0.1 KOH          | [10] |

## References

- Kushwaha, H.S.; Halder, A.; Thomas, P.; Vaish, R. CaCu<sub>3</sub>Ti<sub>4</sub>O<sub>12</sub>; A bi-functional perovskite electrocatalyst for oxygen evolution and reduction reaction in alkaline medium. *Electrochim. Acta* **2017**, *252*, 532–540.
- Rai, V.; Lee, K.P.; Safanama, D.; Adams, S.; Blackwood, D.J. Oxygen reduction and evolution reaction (ORR and OER) bi-functional electrocatalyst operating in a wide pH range for cathodic applications in Li-Air batteries. *ACS Appl. Energy Mater.* **2020**, *3*, 9417–9427.
- Xu, M.; Sun, H.; Wang, W.; Shen, Y.; Zhou, W.; Wang, J.; Chen, Z.G.; Shao, Z. Scandium and phosphorous co-doped perovskite oxide as high-performance electrocatalysts for the oxygen reduction reaction in alkaline solution. *J. Mater. Sci. Technol.* **2020**, *39*, 22–27.
- Thippani, T.; Mandal, S.; Wang, G.; Ramani, V.K. Probing oxygen reduction and oxygen evolution reaction on bifunctional non-precious metal catalyst for metal-air batteries. *RSC Adv.* **2016**, *6*, 71122–71133, doi:10.1039/C6RA13414A.
- Bian, J.J.; Su, R.; Yao, Y.; Wang, J.; Zhou, J.G.; Li, F.; Wang, Z.L.; Sun, C.W. Mg doped perovskite LaNiO<sub>3</sub> nanofibers as an efficient bifunctional catalyst for rechargeable zinc-air batteries. *ACS Appl. Energy Mater.* **2019**, *2*, 923–931.
- Wang, H.Z.; Xu, W.C.; Richins, S.; Liaw, K.; Yan, L.T.; Zhou, M.; Luo, H.M. Polymer-assisted approach to LaCo<sub>1-x</sub>Ni<sub>x</sub>O<sub>3</sub> network nanostructures as bifunctional oxygen electrocatalysts. *Electrochim. Acta* **2019**, *296*, 945–953.
- Song, W.; Ren, Z.; Chen, S.Y.; Meng, Y.; Biswas, S.; Nandi, P.; Elsen, H.A.; Gao, P.X.; Suib, S.L. Ni and Mn-Promoted Mesoporous Co<sub>3</sub>O<sub>4</sub>: A Stable Bifunctional Catalyst with Surface Structure Dependent Activity for Oxygen Reduction Reaction and Oxygen Evolution Reaction. *ACS Appl. Mater. Interfaces* **2016**, *8*, 20802–20813, doi:10.1021/acsami.6b06103.
- Wang, X.; Dou, Y.; Xie, Y.; Wang, J.; Xia, T.; Huo, L.; Zhao, H. A-site cation-ordering layered perovskite EuBa<sub>0.5</sub>Sr<sub>0.5</sub>Co<sub>2-x</sub>Fe<sub>x</sub>O<sub>5+δ</sub> as highly active and durable electrocatalyst for oxygen evolution reaction. *ACS Omega* **2020**, *5*, 12501–12515.
- Hansen, K.K.; Electrochemical reduction of oxygen and nitric oxide on Mn-based perovskites with different A-site cations. *Int. J. Electrochem.* **2020**, 4013697.
- Qu, M.; Ding, X.; Shen, Z.; Cui, M.; Oropeza, F.E.; Gorni, G.; de la Peña O'Shea, V.A.; Li, W.; Qi, D.-S.; Zhang, K.H. Tailoring the Electronic Structures of the La<sub>2</sub>NiMnO<sub>6</sub> Double Perovskite as Efficient Bifunctional Oxygen Electrocatalysis. *Chem. Mater.* **2021**, *33*, 2062–2071.
